# Supplementary material
Source: PubMed Central journal article supplement (PMC6646535)
Supplement: ao8b01265_si_001.pdf [file ao8b01265_si_001.pdf]

## Supplementary Information

Fabrication of Bis-Quaternary Ammonium Salt as an Efficient  
Bactericidal Weapon against Escherichia coli and Staphylococcus aureus

**Zhiyong Song,<sup>†§</sup> Huajuan Wang,<sup>‡§</sup> Yang Wu<sup>†</sup>, Jiangjiang Gu<sup>†</sup>, Shuojun Li<sup>†</sup> and  
Heyou Han<sup>\*†‡</sup>**

<sup>†</sup>State Key Laboratory of Agricultural Microbiology, College of Science, Huazhong  
Agricultural University, Wuhan, 430070, PR China.

<sup>‡</sup>State Key Laboratory of Agricultural Microbiology, College of Food Science and  
Technology, Huazhong Agricultural University, Wuhan, 430070, PR China.

\* Corresponding Author E-mail: [hyhan@mail.hzau.edu.cn](mailto:hyhan@mail.hzau.edu.cn).

<sup>†</sup> Equal contribution.

### Table of Contents:

S1: Structural formula and MS spectrum of BQAS

S2: Antibacterial activity of BQAS

S3: Zeta potential of bacteria

S4: DNA strides of bacterial cells

S5: ROS generation

S6: Intracellular superoxide levels

S7: The cytotoxicity assay of BQAS against the 4T1 cell.

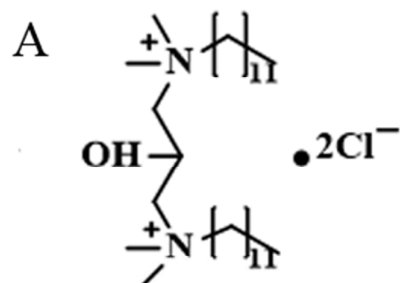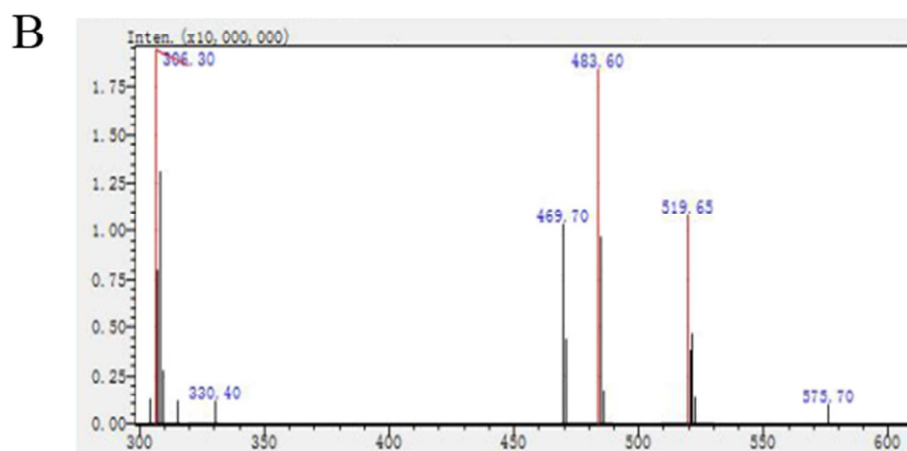

**Figure S1.** Structural formula (A) and MS spectrum (B) of BQAS.

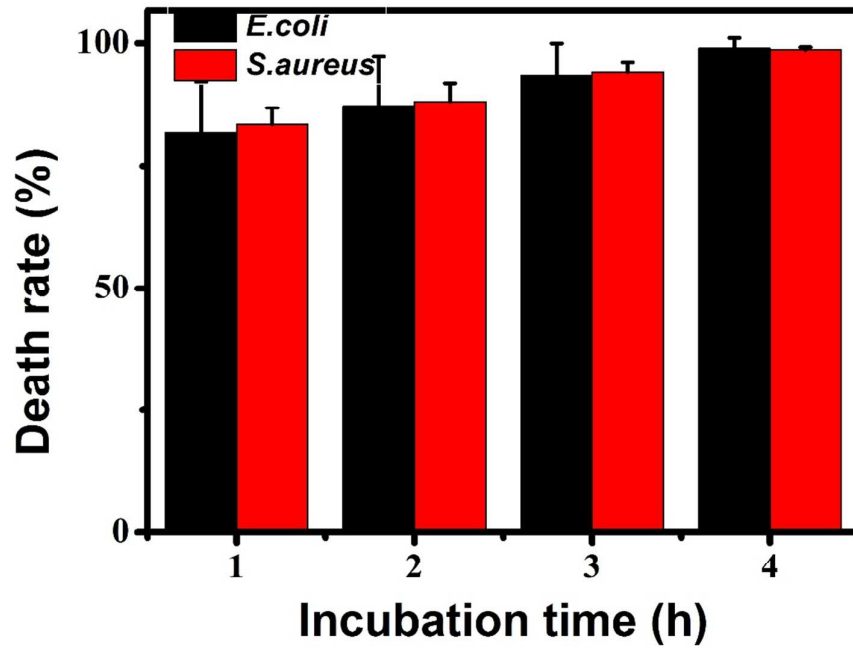

**Figure S2.** Effects of different incubation time on antibacterial activity of BQAS. Bacterial cells ( $10^8$  CFU/mL) incubated with BQAS ( $50 \mu\text{g/mL}$ ) in 1h, 2h, 3h and 4h, respectively.

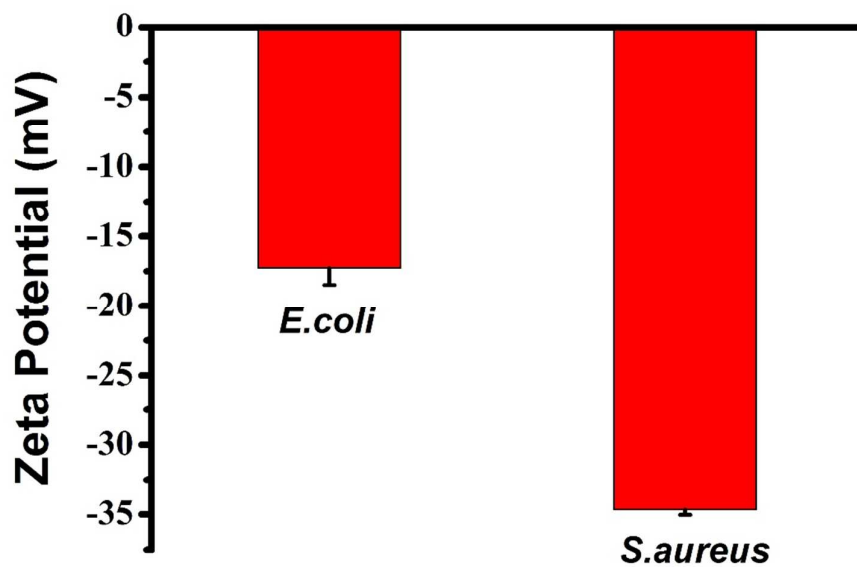

**Figure S3.** Zeta potential measurements of *E. coli* and *S. aureus*.

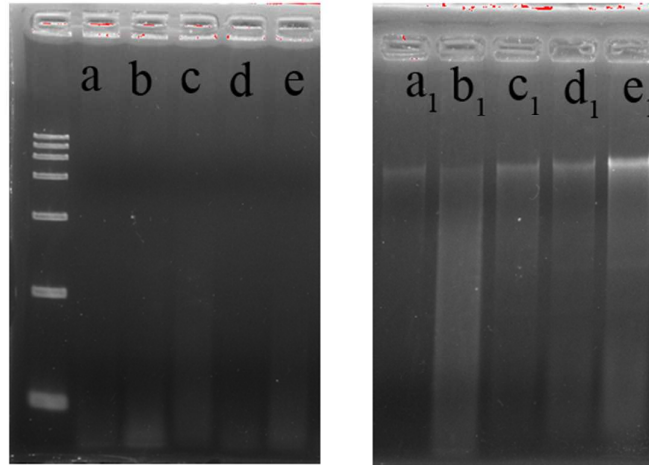

**Figure S4.** The DNA strides of the supernatant of bacterial cells (left: *S.aureus*, right: *E.coli*) treated with different concentrations of BQAS. a, a<sub>1</sub>: 0 µg/mL, b, b<sub>1</sub>: 25 µg/mL, c, c<sub>1</sub>: 50 µg/mL; d, d<sub>1</sub>: 100 µg/mL and e, e<sub>1</sub>: 200 µg/mL.

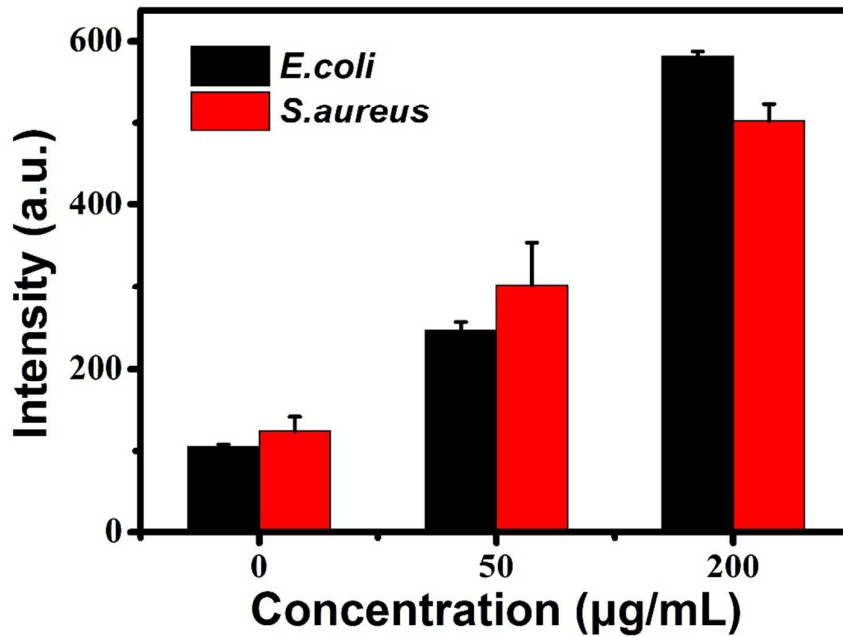

**Figure S5.** ROS generation after the bacterial cells ( $10^8$  CFU/mL) incubated with BQAS at concentrations of 0 µg/mL, 50 µg/mL, and 200 µg/mL, respectively.

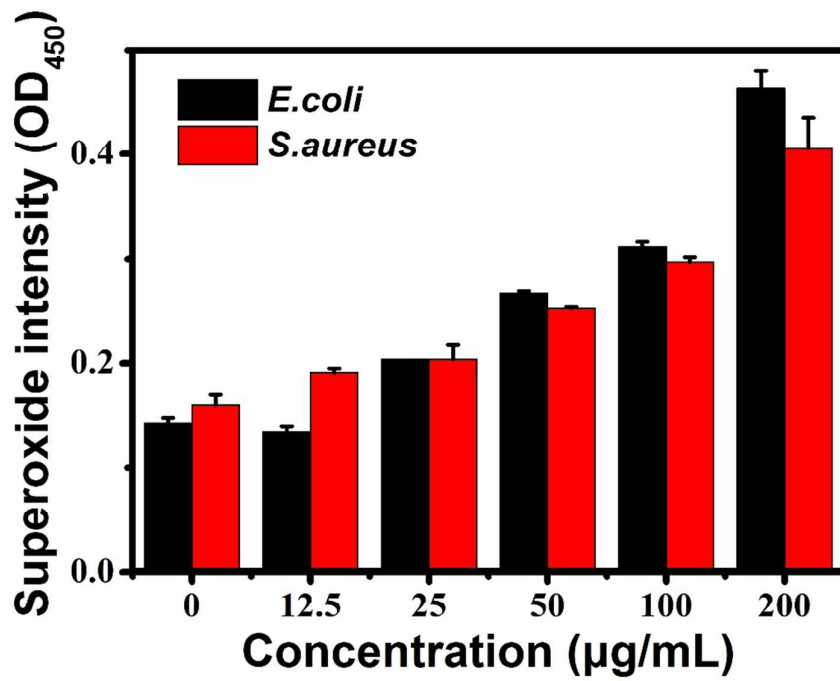

Figure S6. Intracellular superoxide levels of the cells ( $10^8$  CFU/mL) treated with different concentrations (0-200 µg/mL) of BQAS.

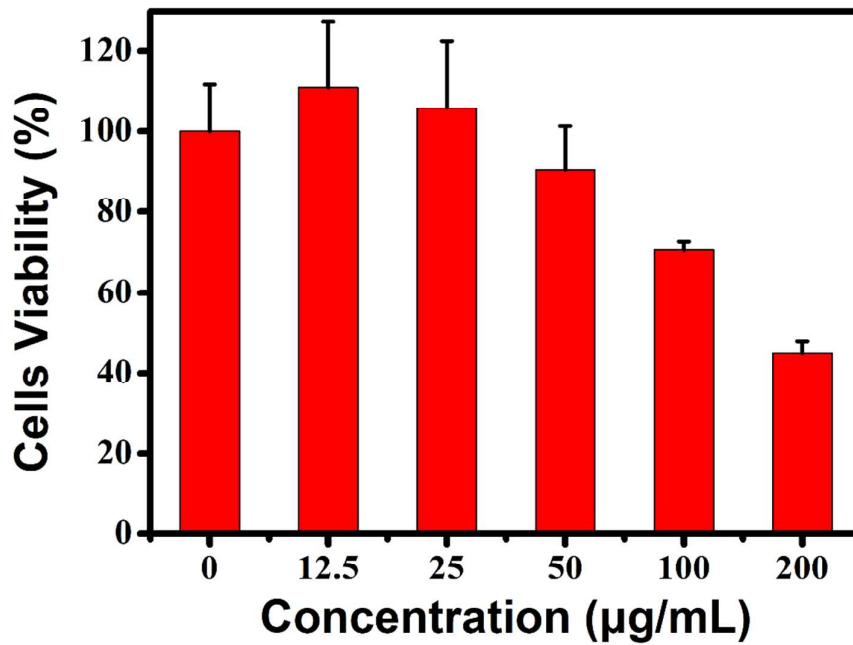

Figure S7. The cytotoxicity assay of BQAS against the 4T1 cell.
